# Supplementary material for: The emotional canvas of human screams: patterns and acoustic cues in the perceptual categorization of a basic call type
Source: PeerJ. 2021 Mar 9;9:e10990. doi: 10.7717/peerj.10990 (PMC7953872; doi:10.7717/peerj.10990)
Supplement: Supplemental Information 2 [file peerj-09-10990-s002.xlsx]

## Sheet: Acoustic Data for PeerJ
Label	Stimulus	F0Min	F0Max	F0Range	F0Mean	HNRmean	Actual_Emotion	Mean_Anger	Mean_Fear	Mean_Frustration	Mean_Happiness	Mean_Pain	Mean_Surprise	Mean_Match	Mean_Nonmatch	Duration	Roughness_Mean	LUFS
Fear_1	Anger_1	221.9	347.8	125.9	322.1	3.07	1	4.24176	2.17582	3.95604	1.71978	3.49451	1.96703	4.24176	2.66264	1.345	37.15	-22.9
Frustration_1	Anger_2	360.1	403.3	43.2	384.1	1.41	1	4.41209	2.64286	4.01099	1.65934	4.23626	1.74176	4.41209	2.85824	2.879	41.12	-22.11
Pain_1	Fear_1	510.9	2117.8	1606.9	1780.1	7.43	2	2.84615	4.65934	3.04396	1.8956	3.13736	3.42308	4.65934	2.86923	1.179	35.98	-19.01
Surprise_1	Fear_2	671.6	1366.4	694.8	1174.2	3.29	2	3.21429	4.32418	3	1.51099	4.10989	2.58242	4.32418	2.88352	1.783	34.5	-21.5
Pain_2	Fear_3	957.4	1238.7	281.3	1005.1	0.34	2	2.71429	3.68681	3.22527	1.91209	2.57143	4.03297	3.68681	2.89121	0.318	37.1	-21.29
Surprise_2	Fear_4	803.1	1349	545.9	1096.6	3.14	2	2.7967	4.32418	2.68132	1.87363	3.31319	3.81319	4.32418	2.8956	0.498	33.21	-21.12
Pain_3	Fear_5	590.4	2277.2	1686.8	2076.2	15.34	2	2.38462	4.7033	2.43956	2.02747	3.20879	3.18132	4.7033	2.64835	2.819	31.08	-19.12
Fear_2	Frustration_1	1104.2	2166.1	1061.9	1940.4	7.61	3	2.15385	3.77473	2.53297	3.17033	2.20879	4.07692	2.53297	3.07692	0.296	30.07	-13.98
Fear_3	Happiness_1	549.9	2480.9	1931	1815.7	10.42	4	2.36813	4.02198	2.84615	2.74176	2.5	3.60989	2.74176	3.06923	0.676	25.87	-25.64
Fear_4	Happiness_10	416.4	1334.6	918.2	1095	9.61	4	2.11538	3.8022	2.39011	3.29121	2.73077	3.95604	3.29121	2.9989	0.685	24.5	-7.79
Pain_4	Happiness_11	983.5	1241	257.5	1178.3	19.31	4	1.95604	4.14286	2.26374	2.73626	3.22527	3.09341	2.73626	2.93626	1.312	20.55	-8.83
Happiness_1	Happiness_2	1089.7	2826.1	1736.4	2279.2	18.8	4	2.52198	4.47253	2.57143	2.23077	3.45055	2.64835	2.23077	3.13297	3.874	27.46	-5.74
Surprise_3	Happiness_3	975.7	2110.2	1134.5	1465.7	18.08	4	1.84066	3.67582	2.45055	1.73077	4.06593	2.0989	1.73077	2.82637	4.583	23.1	-8.61
Surprise_4	Happiness_4	2359.5	3475.8	1116.3	3235.3	13.46	4	2.50549	4.27473	2.64835	2.93956	3.04945	3.53297	2.93956	3.2022	0.809	30.22	-8.52
Fear_5	Happiness_5	376.6	2685.6	2309	2304.5	12.96	4	2.68132	4.49451	2.92308	2.54945	3.19231	3.43956	2.54945	3.34615	1.114	25.91	-9.43
Surprise_5	Happiness_6	1950.8	3244.5	1293.7	2721.5	13.49	4	2.53846	4.45604	2.92857	3.15385	2.78022	3.60989	3.15385	3.26264	0.938	27.6	-7.02
Happiness_2	Happiness_7	2311.3	3672.6	1361.3	3330.3	8.6	4	2.25275	4.14835	2.50549	3.18132	2.32418	4.14835	3.18132	3.07582	0.533	30.05	-7.94
Happiness_3	Happiness_8	2400.3	3465.3	1065	3189.4	11.72	4	2.56044	4.56044	2.9011	2.91758	2.92857	3.67582	2.91758	3.32527	0.959	26.81	-7.2
Pain_5	Happiness_9	769.8	1334.7	564.9	1198.7	5.55	4	3.35714	3.96154	3.36264	2.61538	4.04945	2.84066	2.61538	3.51429	1.256	31.66	-10.85
Anger_1	Pain_1	620.5	1514.3	893.8	1303.2	13.2	5	2.27473	4.30769	2.59341	2.43407	3.06044	3.2967	3.06044	2.98132	1.161	27.91	-22.45
Anger_2	Pain_2	497.3	1804.7	1307.4	1116.9	11.51	5	2.06593	3.52747	2.76923	2.98352	2.8022	3.22527	2.8022	2.91429	0.637	23.53	-19.2
Happiness_4	Pain_3	302.5	653	350.5	401	8.36	5	3.84066	3.6978	3.6044	1.53297	4.30769	2.5	4.30769	3.03516	1.464	29.54	-14.35
Happiness_5	Pain_4	301.9	604.6	302.7	388.7	2.65	5	3.37363	3.47253	3.29121	1.47253	4.45055	2.02747	4.45055	2.72747	2.71	34.74	-23.39
Happiness_6	Pain_5	119.1	359.1	240	270.2	5.11	5	2.46703	1.58791	2.8022	1.37363	4.32967	1.67033	4.32967	1.98022	1.089	30.27	-21.06
Happiness_7	Pain_6	384.9	820.1	435.2	580.4	6.63	5	1.23077	1.58791	1.49451	3.92308	1.71429	3.34066	1.71429	2.31538	0.747	20.67	-11.52
Happiness_8	Surprise_1	424.3	1174.9	750.6	843.8	2.78	6	1.36813	2.57143	1.99451	3.18132	1.64286	3.93407	3.93407	2.15165	0.367	32.26	-23.23
Pain_6	Surprise_2	910	1165	255	1096.7	7.44	6	1.44505	3.03846	1.96154	3.28022	1.45604	4.39011	4.39011	2.23626	0.195	27.13	-19.18
Happiness_9	Surprise_3	430.5	1536.4	1105.9	1166.5	2.19	6	2.38462	3.54396	2.75275	2.20879	2.53846	3.89011	3.89011	2.68571	0.373	37.34	-14.25
Happiness_10	Surprise_4	752.6	1174.9	422.3	1012.5	10.81	6	1.25824	2.63736	1.69231	3.25824	1.52198	4.09341	4.09341	2.07363	0.273	22.39	-21.33
Happiness_11	Surprise_5	539.8	1052.6	512.8	880.8	10.7	6	1.36264	3.33516	1.8022	2.81319	1.45055	4.35165	4.35165	2.15275	0.28	20.32	-19.25
